# Supplementary material for: Protein Kinase D1 regulates focal adhesion dynamics and cell adhesion through Phosphatidylinositol-4-phosphate 5-kinase type-l γ
Source: PubMed Central journal article supplement (PMC5075913; doi:10.1038/srep35963), 2016-10-24
Supplement: srep35963-s1.pdf [file srep35963-s1.pdf]

Supplementary Information  
for

# **Protein Kinase D1 regulates focal adhesion dynamics and cell adhesion through Phosphatidylinositol-4- phosphate 5-kinase type-I $\gamma$**

Nisha Durand<sup>1</sup>, Ligia I. Bastea<sup>1</sup>, Jason Long<sup>1</sup>, Heike Döppler<sup>1</sup>, Kun Ling<sup>2</sup>  
and Peter Storz<sup>1,3</sup>

<sup>1</sup> Department of Cancer Biology, Mayo Clinic, Jacksonville, Florida 32224, USA

<sup>2</sup> Department of Biochemistry and Molecular Biology, Mayo Clinic, Rochester, Minnesota 55905, USA

<sup>3</sup> Corresponding author: Peter Storz, Mayo Clinic, 4500 San Pablo Road, Jacksonville, FL 32224. Phone: 904 953-6909, FAX: 904 953-0277, e-mail: [storz.peter@mayo.edu](mailto:storz.peter@mayo.edu)

**A**

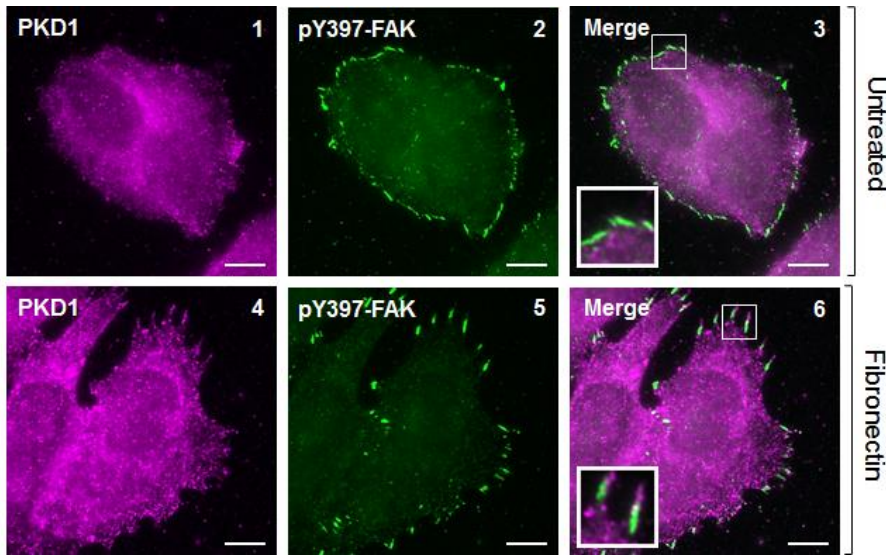

**B**

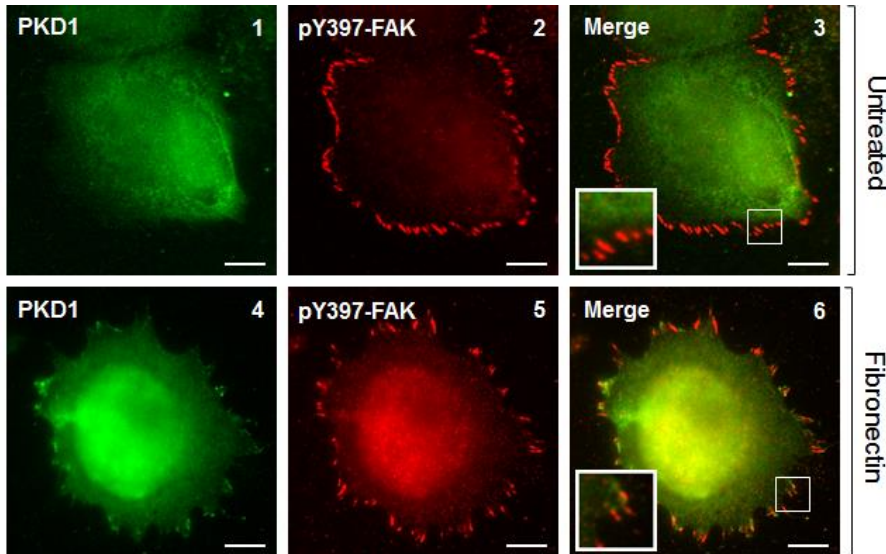

**C**

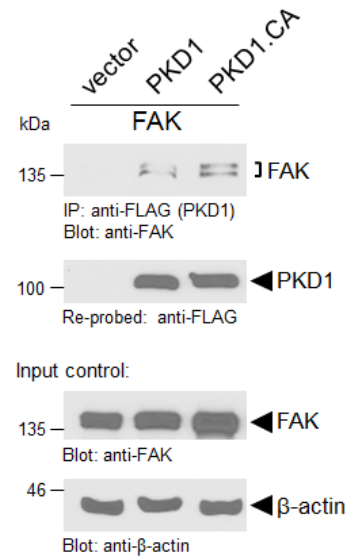

**D**

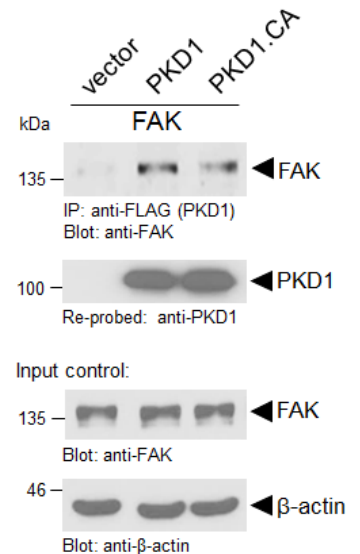

Supplemental Figure S1, relates to Figure 1: **Cellular localization of endogenous PKD1 and pY397-FAK, and co-immunoprecipitation of ectopically expressed PKD1 and FAK.** **A, B:** MCF-7 cells ( $0.10 \times 10^6$  cells /well, 24-well plate) were seeded on fibronectin-coated ( $2 \mu\text{g/ml}$ ) glass coverslips and serum-starved for 16 hrs. Following serum-starvation, cells were stimulated with  $10 \mu\text{g/ml}$  fibronectin or left untreated. After 30 minutes, cells were fixed and the localization of endogenous PKD1 (Everest antibody in **A**; Abnova antibody in **B**) and pY397-FAK was determined by immunofluorescence analysis. Scale bars indicate  $10 \mu\text{m}$ . Insets are 2.4-fold enhanced. **C, D:** Hek293T cells ( $0.5 \times 10^6$  cells/well, 6 well plate) in **C**, or NIH-3T3 cells ( $2 \times 10^6$  cells/10 cm dish) in **D**, were transfected with mCherry-FAK and vector control, FLAG-tagged wildtype PKD1 (PKD1) or FLAG-tagged constitutively-active PKD1 (PKD1.CA) as indicated. PKD1 was immunoprecipitated (anti-FLAG) and immunoprecipitates were analyzed for co-immunoprecipitated FAK. Samples were re-probed for overexpressed PKD1. Control Western blots of lysates were probed for FAK and  $\beta$ -actin expression.

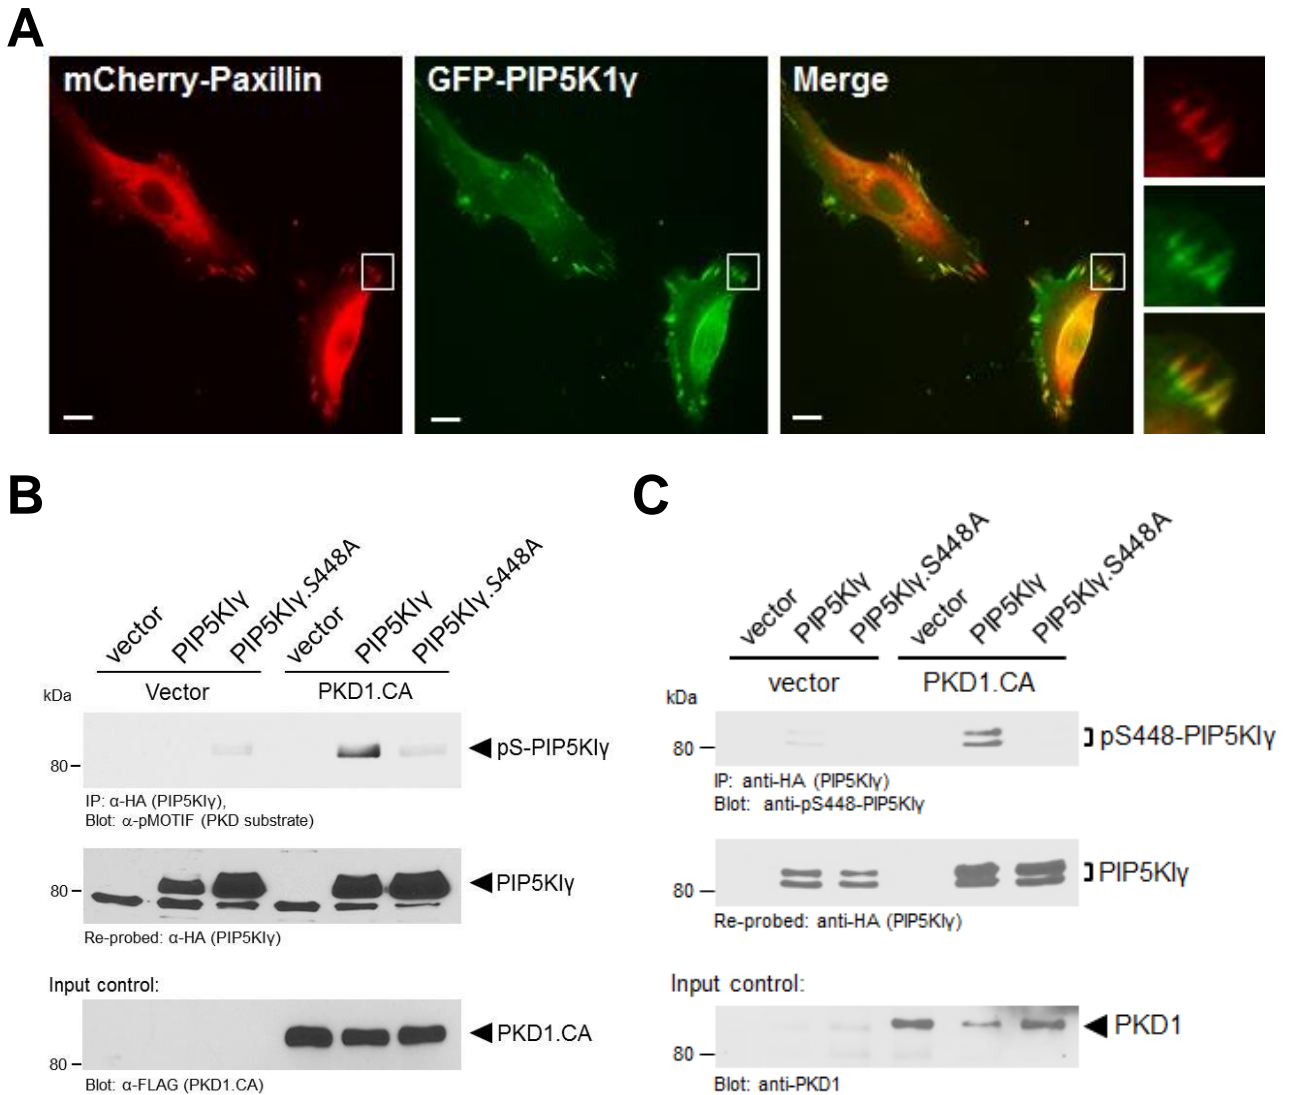

Supplemental Figure S2, relates to Figure 2: **PIP5K1 $\gamma$  localizes to focal adhesions and is phosphorylated by PKD1 at S448.** **A:** NIH-3T3 cells were co-transfected with mCherry-Paxillin and GFP-PIP5K1 $\gamma$ . Scale bars indicate 10  $\mu$ m. The inset in is 6.5-fold enhanced on the right. **B:** HeLa cells ( $0.65 \times 10^6$  cells/6 cm dish) were co-transfected with vector and FLAG-tagged constitutively-active PKD1 (PKD1.CA) and vector, HA-tagged PIP5K1 $\gamma$  or PIP5K1 $\gamma$ .S448A as indicated. PIP5K1 $\gamma$  was immunoprecipitated (anti-HA) and assessed for PKD1-mediated phosphorylation using the pMOTIF antibody which recognizes phosphorylated PKD substrates. Immunoprecipitates were re-probed with anti-HA for equal loading of PIP5K1 $\gamma$  and PIP5K1 $\gamma$ .S448A. Lysates were evaluated for PKD1.CA expression (anti-FLAG). **C:** HeLa cells ( $0.25 \times 10^6$  cells/well, 6 well plate) were co-transfected with vector control or FLAG-tagged constitutively-active PKD1 (PKD1.CA) and vector, HA-tagged PIP5K1 $\gamma$  or PIP5K1 $\gamma$ .S448A, as indicated. PIP5K1 $\gamma$  was immunoprecipitated (anti-HA) and assessed for PKD1-mediated phosphorylation using a pS448-PIP5K1 $\gamma$  antibody. Immunoprecipitates were re-probed with anti-HA for equal loading of PIP5K1 $\gamma$  and PIP5K1 $\gamma$ .S448A. The lysates were evaluated for PKD1 expression (anti-PKD1).

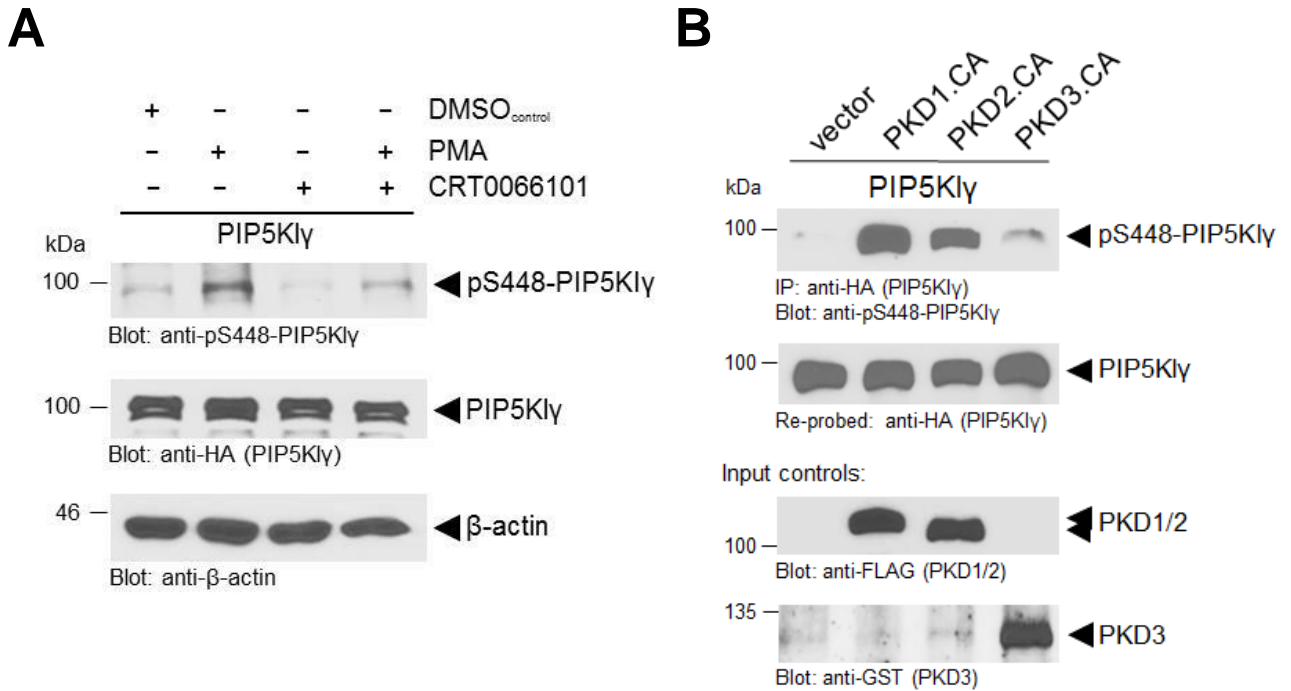

Supplemental Figure S3, relates to Figure 2: **PIP5Kly is mainly phosphorylated by PKD1. A:** Hek293T cells ( $0.6 \times 10^6$  cells/well, 6 well plate) were transfected with HA-tagged PIP5Kly, and stimulated with PMA (500 nM, 15 min), CRT0066101 ( $2.5 \mu\text{M}$ , 60 min) or DMSO control as indicated. Cell lysates were probed for PIP5Kly phosphorylation (anti-pS448-PIP5Kly) and re-probed for total PIP5Kly (anti-HA). Control blots were probed for  $\beta$ -actin. **B:** Hek293T cells ( $0.5 \times 10^6$  cells/well, 6 well plate) were co-transfected with HA-tagged PIP5Kly along with vector control, FLAG-tagged constitutively-active PKD1 (PKD1.CA), FLAG-tagged constitutively-active PKD2 (PKD1.CA), or GST-tagged constitutively-active PKD3 (PKD3.CA). An anti-HA antibody was used to immunoprecipitate PIP5Kly from cells. Immunoprecipitates were subjected to SDS PAGE, and assessed using a pS448-PIP5Kly antibody. Samples were counterstained for total PIP5Kly using an anti-HA antibody. Control blots were performed for PKD1/2 (anti-FLAG), PKD3 (anti-GST) and  $\beta$ -actin expression.

**A**

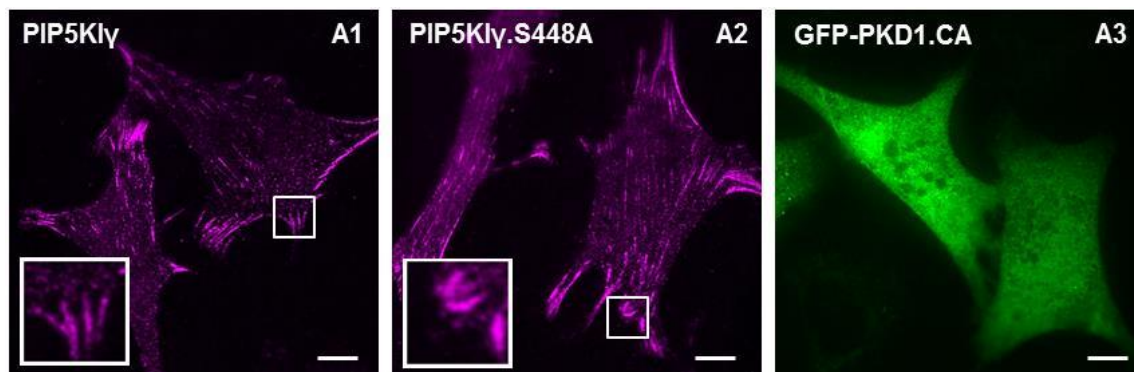

**B**

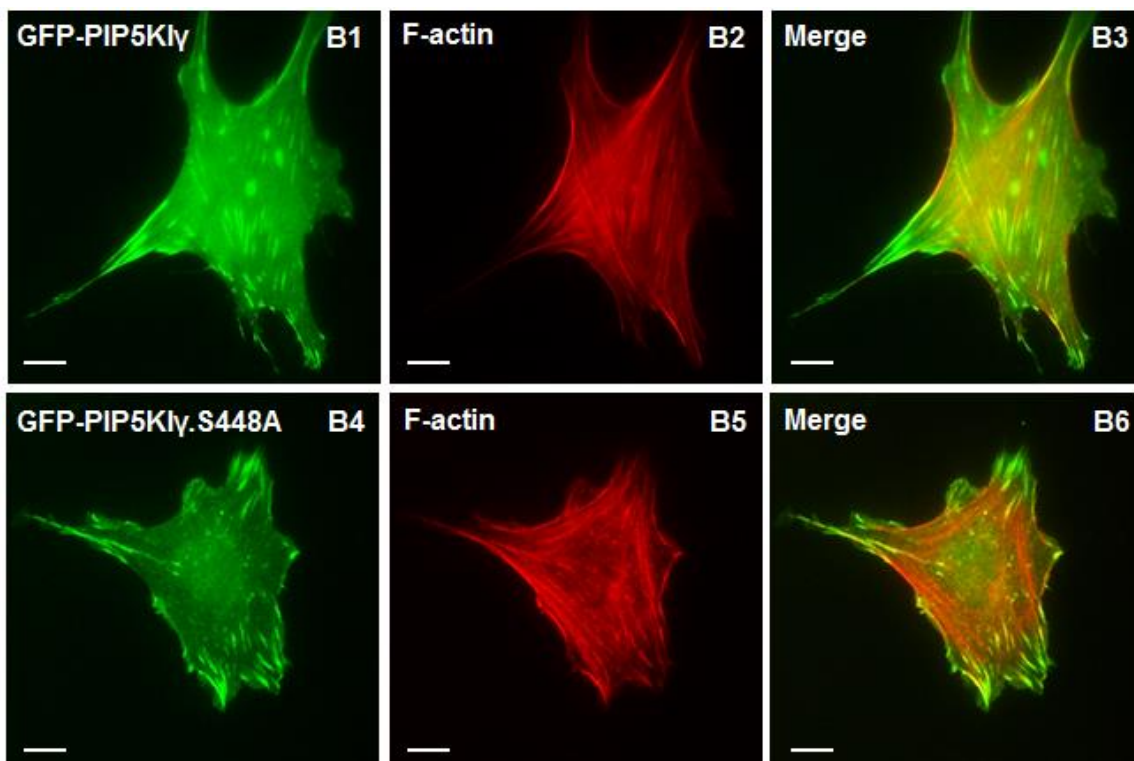

Supplemental Figure S4, relates to Figure 3: **Cellular localization of PIP5K1γ and PIP5K1γ.S448A.** **A:** Controls for Figure 3A. NIH-3T3 cells expressing HA-tagged PIP5K1γ or PIP5K1γ.S448A or GFP-tagged active PKD1 (GFP-PKD1.CA) were seeded ( $0.05 \times 10^6$  cells/well, 24 well plate) on fibronectin-coated ( $2 \mu\text{g/ml}$ ) glass coverslips. Following fixation, immunofluorescence analysis was used to determine the localization of PIP5K1γ and GFP-PKD1. Scale bars indicate  $10 \mu\text{m}$ . **B:** NIH-3T3 cells co-expressing GFP-PIP5K1γ or GFP-PIP5K1γ.S448A and RFP-LifeACT (to label F-actin structures) were seeded on fibronectin-coated ( $2 \mu\text{g/ml}$ ) glass coverslips ( $0.05 \times 10^6$  cells/well, 24 well plate). Following fixation, cells were analyzed by immunofluorescence. Scale bars indicate  $10 \mu\text{m}$ .

**A-D**

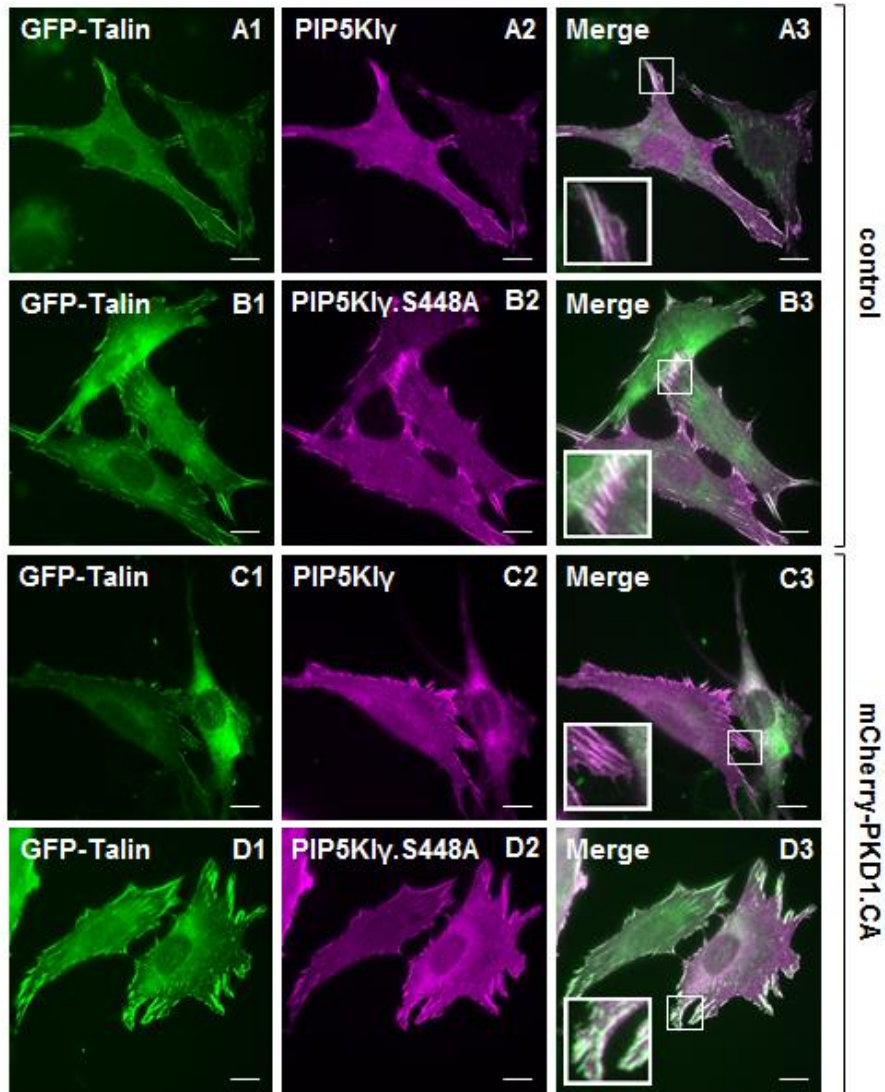

Expression controls:

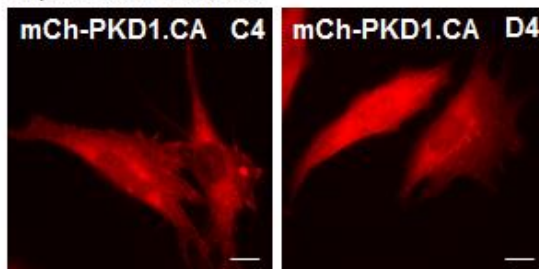

Supplemental Figure S5, relates to Figure 3: **S448 phosphorylation inhibits interaction of PIP5K1 $\gamma$  and Talin.** **A-D:** NIH-3T3 cells expressing mCherry-PKD1.CA, GFP-Talin with HA-tagged PIP5K1 $\gamma$  or PIP5K1 $\gamma$ .S448A were seeded on fibronectin-coated (2  $\mu$ g/ml) glass coverslips. Localization of Talin and PIP5K1 $\gamma$  was determined by immunofluorescence analysis. Scale bars indicate 10  $\mu$ m. Insets are 2.6-fold enhanced.

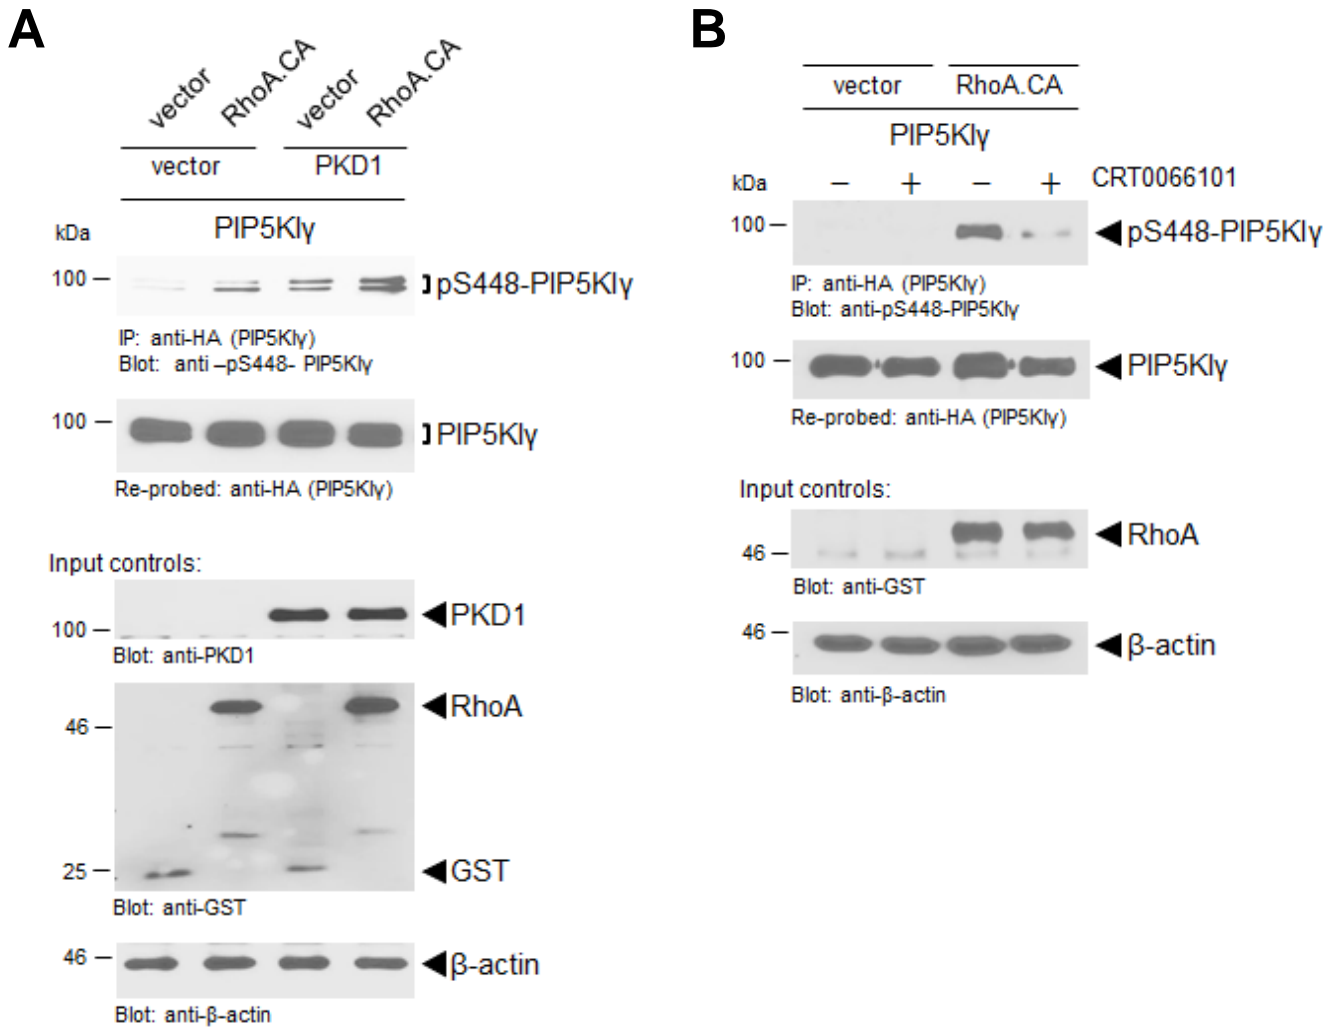

Supplemental Figure S6, relates to Figure 4: **PKD1-mediated phosphorylation of S448 occurs in response to Fibronectin-RhoA signaling.** **A:** HeLa cells ( $0.25 \times 10^6$  cells/well, 6 well plate) were co-transfected with HA-tagged PIP5Kly, vector or FLAG-tagged PKD1 and vector or GST-tagged active RhoA (RhoA.CA), as indicated. PIP5Kly was immunoprecipitated (anti-HA) and analyzed using pS448-PIP5Kly antibody. Samples were re-probed with anti-HA to determine PIP5Kly loading. Control blots were probed for PKD1, RhoA.CA (anti-GST) and  $\beta$ -actin expression. **B:** HeLa cells ( $0.25 \times 10^6$  cells/well, 6 well plate) were co-transfected with HA-tagged PIP5Kly and vector control or GST-tagged active RhoA (RhoA.CA). Cells were stimulated with CRT0066101 (500 nM, 16 hours) or left untreated as indicated. PIP5Kly was immunoprecipitated (anti-HA) and analyzed using the pS448- PIP5Kly antibody. Immunoprecipitates were re-probed for total PIP5Kly (anti-HA). Control blots were probed for RhoA.CA (anti-GST) and  $\beta$ -actin expression.

**A**

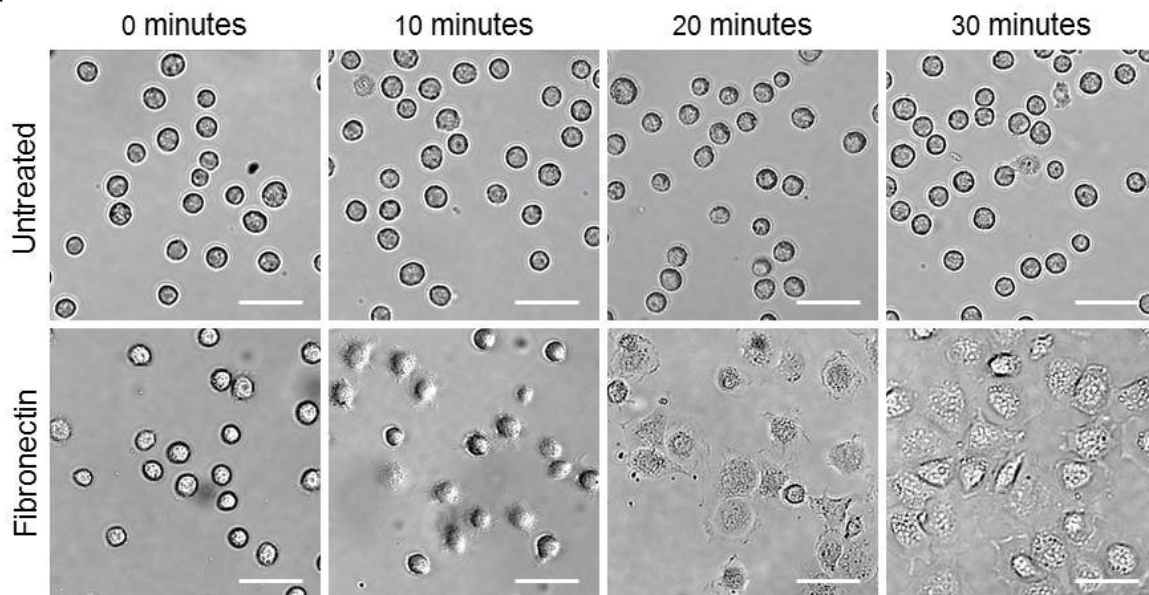

**B**

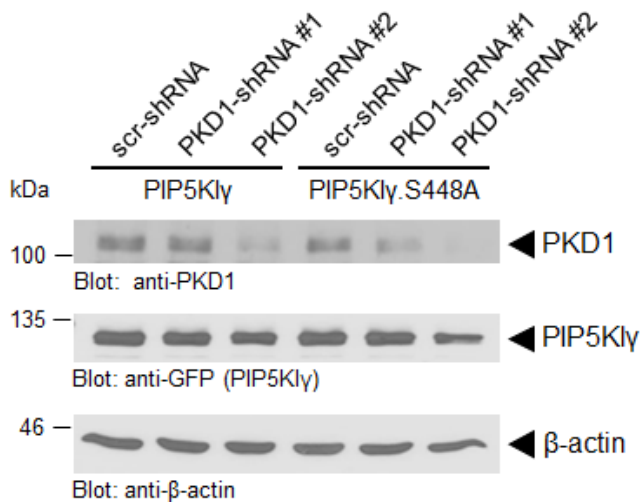

Supplemental Figure S7, relates to Figure 5: **Attachment of NIH-3T3 cells to fibronectin.**  
**A:** NIH-3T3 cells ( $0.05 \times 10^6$  cells/well, 24 well plate) were plated on non-coated or fibronectin-coated (10  $\mu\text{g/ml}$ ) glass coverslips. Bright field images were acquired at the times indicated to determine the number of cells attached. The bar indicates 50  $\mu\text{m}$ . **B:** Control blots for Figures 5C and 5D. Cell lysates were evaluated by Western blotting for the expression of PIP5Kly (anti-GFP), PKD1 and  $\beta$ -actin.
